# Supplementary material for: SPI-Based Drought Classification in Italy: Influence of Different Probability Distribution Functions
Source: MDPI journal article supplement (doi:10.3390/w14223668), 2022-11-14
Supplement: s1 [file s1]

# Supplementary Materials for “SPI-based drought classification in Italy: influence of different probability distribution functions”

Benedetta Moccia, Claudio Mineo, Elena Ridolfi, Fabio Russo, Francesco Napolitano

Table S1. Information on the 332 stations selected from the SCIA system. The station name is composed by the name of the rain gauge and the regional or national service acronym.

| index | Region   | Station                            | Latitude<br>(°N) | Longitude<br>(°E) | Elevation<br>(m a.s.l.) | KG<br>class |
|-------|----------|------------------------------------|------------------|-------------------|-------------------------|-------------|
| 1     | Abruzzo  | BOMBA-Idro                         | 42.034445        | 14.368333         | 563                     | Cfa         |
| 2     | Abruzzo  | CAPESTRANO-Idro                    | 42.268889        | 13.762222         | 493                     | Cfb         |
| 3     | Abruzzo  | CARAPELLE CALVISIO-Idro            | 42.3             | 13.681667         | 922                     | Cfb         |
| 4     | Abruzzo  | LANCIANO-Idro                      | 42.225834        | 14.384444         | 273                     | Cfa         |
| 5     | Abruzzo  | PENNE-Idro                         | 42.464445        | 13.9175           | 399                     | Cfb         |
| 6     | Abruzzo  | PIETRACAMELA-Idro                  | 42.523611        | 13.554722         | 1126                    | Cfb         |
| 7     | Abruzzo  | ROCCACASALE-Idro                   | 42.122223        | 13.885833         | 447                     | Cfb         |
| 8     | Abruzzo  | VILLA S.LUCIA-Idro                 | 42.333611        | 13.779444         | 1119                    | Cfb         |
| 9     | Calabria | Arena-Idro                         | 38.562141        | 16.216917         | 566                     | Csa         |
| 10    | Calabria | Borgia-Idro                        | 38.826947        | 16.507778         | 298                     | Csa         |
| 11    | Calabria | Briatico-Idro                      | 38.726946        | 16.036389         | 49                      | Csa         |
| 12    | Calabria | Calimera-Idro                      | 38.556669        | 16.018611         | 141                     | Csa         |
| 13    | Calabria | Campotenese-Idro                   | 39.872502        | 16.068333         | 978                     | Csa         |
| 14    | Calabria | Capo dell'Armi-Idro                | 37.964724        | 15.684167         | 180                     | Csa         |
| 15    | Calabria | Cassano allo Ionio-Idro            | 39.783085        | 16.318944         | 180                     | Csa         |
| 16    | Calabria | Castroregio-Idro                   | 39.993614        | 16.478611         | 546                     | Csa         |
| 17    | Calabria | Cerisano-Idro                      | 39.281113        | 16.174444         | 584                     | Csa         |
| 18    | Calabria | Ciro Marina-Idro                   | 39.407782        | 17.109444         | 27                      | Csa         |
| 19    | Calabria | Crosia-Idro                        | 39.56667         | 16.773056         | 136                     | Csa         |
| 20    | Calabria | Curinga Scalo-Idro                 | 38.840002        | 16.261111         | 37                      | Csa         |
| 21    | Calabria | Decollatura-Idro                   | 39.046363        | 16.358278         | 745                     | Csa         |
| 22    | Calabria | Filadelfia-Idro                    | 38.786946        | 16.293056         | 579                     | Csa         |
| 23    | Calabria | Firmo-Idro                         | 39.721946        | 16.174167         | 311                     | Csa         |
| 24    | Calabria | Gioiosa Ionica-Idro                | 38.301114        | 16.329722         | 18                      | Csa         |
| 25    | Calabria | Joppolo-Idro                       | 38.592002        | 15.90525          | 635                     | Csa         |
| 26    | Calabria | Marcellinara-Idro                  | 38.928614        | 16.494444         | 366                     | Csa         |
| 27    | Calabria | Montebello Ionico-Idro             | 37.983891        | 15.758333         | 463                     | Csa         |
| 28    | Calabria | Morano Calabro-Idro                | 39.840085        | 16.138028         | 604                     | Csa         |
| 29    | Calabria | Nocera Terinese-Idro               | 39.037835        | 16.166306         | 332                     | Csa         |
| 30    | Calabria | Oppido Mamertina - Castellace-Idro | 38.312502        | 15.940278         | 195                     | Csa         |
| 31    | Calabria | Palermi-Idro                       | 38.749197        | 16.452861         | 525                     | Csa         |
| 32    | Calabria | Piane Crati-Idro                   | 39.232502        | 16.322778         | 577                     | Csa         |
| 33    | Calabria | Rende-Idro                         | 39.331113        | 16.180278         | 392                     | Csa         |
| 34    | Calabria | Roggiano Gravina-Idro              | 39.61778         | 16.150556         | 258                     | Csa         |
| 35    | Calabria | Rossano-Idro                       | 39.574447        | 16.634167         | 223                     | Csa         |

|    |                       |                                  |           |           |      |     |
|----|-----------------------|----------------------------------|-----------|-----------|------|-----|
| 36 | Calabria              | San Giacomo d'Acri-Idro          | 39.52417  | 16.465    | 720  | Csa |
| 37 | Calabria              | San Giorgio Albanese-Idro        | 39.583336 | 16.452778 | 325  | Csa |
| 38 | Calabria              | San Luca-Idro                    | 38.148419 | 16.067278 | 131  | Csa |
| 39 | Calabria              | San Martino di Finita-Idro       | 39.489724 | 16.108056 | 480  | Csa |
| 40 | Calabria              | San Pietro in Guarano-Idro       | 39.345558 | 16.313611 | 766  | Csa |
| 41 | Calabria              | Savuto C.C.-Idro                 | 39.162503 | 16.503611 | 1221 | Csa |
| 42 | Calabria              | Scalea-Idro                      | 39.811085 | 15.792306 | 37   | Csa |
| 43 | Calabria              | Sellia Marina-Idro               | 38.906031 | 16.743639 | 55   | Csa |
| 44 | Calabria              | Simbario-Idro                    | 38.611113 | 16.326944 | 767  | Csa |
| 45 | Calabria              | Staletti-Idro                    | 38.76542  | 16.538778 | 364  | Csa |
| 46 | Calabria              | Strongoli-Idro                   | 39.265559 | 17.047778 | 260  | Csa |
| 47 | Calabria              | Trebisacce-Idro                  | 39.865559 | 16.530556 | 9    | Csa |
| 48 | Calabria              | Verzino-Idro                     | 39.313059 | 16.862222 | 484  | Csa |
| 49 | Emilia-Romagna        | ALFONSINE-Idro                   | 44.49303  | 12.0445   | 7    | Cfa |
| 50 | Emilia-Romagna        | ANZOLAEMILIA-Idro                | 44.55209  | 11.19651  | 36   | Cfa |
| 51 | Emilia-Romagna        | BEDONIA-Idro                     | 44.50747  | 9.62672   | 527  | Cfb |
| 52 | Emilia-Romagna        | BOBBIO-Idro                      | 44.75512  | 9.38367   | 364  | Cfb |
| 53 | Emilia-Romagna        | BOLOGNAUFFID-Idro                | 44.4999   | 11.34614  | 45   | Cfb |
| 54 | Emilia-Romagna        | BOSCHIAVETO-Idro                 | 44.58591  | 9.41993   | 757  | Cfb |
| 55 | Emilia-Romagna        | CALDERARARENO-Idro               | 44.56613  | 11.27214  | 31   | Cfa |
| 56 | Emilia-Romagna        | CASTROCARO-Idro                  | 44.17014  | 11.94938  | 70   | Cfa |
| 57 | Emilia-Romagna        | IMOLA-Idro                       | 44.34583  | 11.71264  | 44   | Cfa |
| 58 | Emilia-Romagna        | LUGODIROMAGNA-Idro               | 44.41773  | 11.9133   | 12   | Cfa |
| 59 | Emilia-Romagna        | MALALBERGO-Idro                  | 44.71847  | 11.52905  | 13   | Cfa |
| 60 | Emilia-Romagna        | MIGNANODIGA-Idro                 | 44.77068  | 9.80334   | 420  | Cfb |
| 61 | Emilia-Romagna        | MONTEOMBRARO-Idro                | 44.37943  | 11.0049   | 684  | Cfb |
| 62 | Emilia-Romagna        | MONTESPIETRO-Idro                | 44.43793  | 11.13634  | 249  | Cfb |
| 63 | Emilia-Romagna        | MONZUNO-Idro                     | 44.27663  | 11.27351  | 587  | Cfb |
| 64 | Emilia-Romagna        | PAVANADIGA-Idro                  | 44.11828  | 11.00554  | 467  | Cfb |
| 65 | Emilia-Romagna        | PIACENZA-ST                      | 44.917    | 9.733     | 138  | Cfb |
| 66 | Emilia-Romagna        | PIANORO-Idro                     | 44.37103  | 11.33988  | 196  | Cfb |
| 67 | Emilia-Romagna        | RIMINI-ST                        | 44.033    | 12.617    | 13   | Cfa |
| 68 | Emilia-Romagna        | RIOLADIVERGATO-Idro              | 44.22888  | 11.05589  | 294  | Cfb |
| 69 | Emilia-Romagna        | RIOLOTERME-Idro                  | 44.27424  | 11.72415  | 78   | Cfa |
| 70 | Emilia-Romagna        | S_LAZZAROALB-Idro                | 45.03506  | 9.72488   | 53   | Cfa |
| 71 | Friuli Venezia Giulia | ALBERONI IDROVORA SACCHETTI-Idro | 45.7779   | 13.5131   | 3    | Cfb |
| 72 | Friuli Venezia Giulia | AMPEZZO-Idro                     | 46.4148   | 12.7988   | 530  | Cfb |
| 73 | Friuli Venezia Giulia | CASTIONS DI STRADA-Idro          | 45.9052   | 13.1941   | 22   | Cfa |
| 74 | Friuli Venezia Giulia | CIVIDALE ISTITUTO AGRARIO-Idro   | 46.0967   | 13.4182   | 135  | Cfb |
| 75 | Friuli Venezia Giulia | CLAUZETTO-Idro                   | 46.2299   | 12.9178   | 607  | Cfb |
| 76 | Friuli Venezia Giulia | CODROIPO-Idro                    | 45.967    | 12.9873   | 49   | Cfa |
| 77 | Friuli Venezia Giulia | FORNI AVOLTRI-Idro               | 46.5868   | 12.7738   | 936  | Dfc |
| 78 | Friuli Venezia Giulia | FOSSALON BONIFICA VITTORIA-Idro  | 45.7341   | 13.4966   | 1    | Cfa |
| 79 | Friuli Venezia Giulia | FRATTA VIVAIIO FORESTALE-Idro    | 46.1785   | 12.727    | 289  | Cfb |
| 80 | Friuli Venezia Giulia | GORGAZZO-Idro                    | 46.038    | 12.4951   | 68   | Dfc |
| 81 | Friuli Venezia Giulia | GORIZIA PRESA C.B.P.I.-Idro      | 45.9341   | 13.596    | 49   | Cfb |
| 82 | Friuli Venezia Giulia | LA MAINA-Idro                    | 46.4509   | 12.7331   | 1169 | Cfb |
| 83 | Friuli Venezia Giulia | LATISANA CROSERE-Idro            | 45.7865   | 13.0221   | 5    | Cfa |

|     |                       |                                       |           |           |      |     |
|-----|-----------------------|---------------------------------------|-----------|-----------|------|-----|
| 84  | Friuli Venezia Giulia | MOGGIO UDINESE-Idro                   | 46.4088   | 13.2003   | 467  | Cfb |
| 85  | Friuli Venezia Giulia | PALMANOVA-Idro                        | 45.9125   | 13.2997   | 30   | Cfa |
| 86  | Friuli Venezia Giulia | PINZANO-Idro                          | 46.1792   | 12.9492   | 173  | Cfb |
| 87  | Friuli Venezia Giulia | SAN GIORGIO DI NOGARO-Idro            | 45.839    | 13.2097   | 7    | Cfa |
| 88  | Friuli Venezia Giulia | SAN VITO AL TAGLIAMENTO OSPEDALE-Idro | 45.9123   | 12.8542   | 30   | Cfa |
| 89  | Friuli Venezia Giulia | SAN VOLFANGO-Idro                     | 46.165    | 13.6427   | 582  | Dfc |
| 90  | Friuli Venezia Giulia | SAURIS DI SOTTO-Idro                  | 46.4656   | 12.7081   | 1163 | Cfb |
| 91  | Friuli Venezia Giulia | SESTO AL REGHENA-Idro                 | 45.8475   | 12.8162   | 13   | Cfa |
| 92  | Friuli Venezia Giulia | TARVISIO-Idro                         | 46.5063   | 13.5701   | 770  | Dfb |
| 93  | Friuli Venezia Giulia | TRAMONTI DI SOPRA-Idro                | 46.3098   | 12.7889   | 506  | Cfb |
| 94  | Friuli Venezia Giulia | TRIESTE-ST                            | 45.65     | 13.75     | 8    | Cfb |
| 95  | Friuli Venezia Giulia | UDINE CASTELLO-Idro                   | 46.0649   | 13.2367   | 109  | Cfb |
| 96  | Friuli Venezia Giulia | VENZONE-Idro                          | 46.3314   | 13.1428   | 418  | Cfb |
| 97  | Lazio                 | Collegio Romano-Idro                  | 41.8986   | 12.4806   | 19   | Csa |
| 98  | Lazio                 | Frascati-Idro                         | 41.8097   | 12.6714   | 245  | Csa |
| 99  | Lazio                 | PONZA-ST                              | 40.917    | 12.95     | 185  | Csa |
| 100 | Lazio                 | ROMA/CIAMPINO-ST                      | 41.783    | 12.583    | 105  | Csa |
| 101 | Liguria               | Alassio-Idro                          | 44.00624  | 8.1693    | 12   | Csb |
| 102 | Liguria               | Genova - Università-Idro              | 44.41561  | 8.92708   | 48   | Csb |
| 103 | Liguria               | Giacopiane-Idro                       | 44.46268  | 9.39525   | 998  | Csb |
| 104 | Liguria               | Imperia - Oss. Meteosismico-Idro      | 43.87957  | 8.01652   | 46   | Csa |
| 105 | Liguria               | Isoverde-Idro                         | 44.53013  | 8.85822   | 253  | Csb |
| 106 | Liguria               | Mignanego-Idro                        | 44.53978  | 8.93975   | 339  | Csb |
| 107 | Liguria               | Monte Cappellino-Idro                 | 44.55062  | 8.95687   | 618  | Csb |
| 108 | Liguria               | Osiglia Diga-Idro                     | 44.31071  | 8.19721   | 646  | Csb |
| 109 | Liguria               | Ricco del Golfo-Idro                  | 44.15261  | 9.76264   | 168  | Csb |
| 110 | Liguria               | S. Margherita Vara-Idro               | 44.2747   | 9.65964   | 225  | Csb |
| 111 | Liguria               | Sanremo - Casino-Idro                 | 43.81484  | 7.77634   | 2    | Csa |
| 112 | Liguria               | Viganego-Idro                         | 44.42855  | 9.06338   | 502  | Csb |
| 113 | Lombardia             | Mantova-Idro                          | 45.158424 | 10.795309 | 17   | Cfa |
| 114 | Lombardia             | Milano_-_Brera-Idro                   | 45.464826 | 9.189024  | 122  | Cfa |
| 115 | Lombardia             | Pavia-Idro                            | 45.193008 | 9.158623  | 81   | Cfa |
| 116 | Lombardia             | Piano_Delle_Casere-Idro               | 45.999486 | 9.791809  | 1900 | Cfb |
| 117 | Lombardia             | Vedeseta-Idro                         | 45.891617 | 9.539965  | 1015 | Cfb |
| 118 | Marche                | Arcevia-Idro                          | 43.497452 | 12.936685 | 538  | Cfb |
| 119 | Marche                | BARGNI-Idro                           | 43.748386 | 12.85288  | 190  | Cfb |
| 120 | Marche                | Cantiano-Idro                         | 43.467068 | 12.640526 | 475  | Cfb |
| 121 | Marche                | Carassai-Idro                         | 43.025967 | 13.645953 | 274  | Cfa |
| 122 | Marche                | Fabriano Centro-Idro                  | 43.330273 | 12.904034 | 361  | Cfb |
| 123 | Marche                | Jesi-Idro                             | 43.531944 | 13.229972 | 118  | Cfa |
| 124 | Marche                | MERCATELLO-Idro                       | 43.644768 | 12.334831 | 433  | Cfb |
| 125 | Marche                | Moie-Idro                             | 43.496212 | 13.125891 | 105  | Cfb |
| 126 | Marche                | Pennabilli Marecchia-Idro             | 43.8202   | 12.269    | 580  | Cfb |
| 127 | Marche                | S. Angelo in Vado-Idro                | 43.666889 | 12.410222 | 405  | Cfb |
| 128 | Molise                | AGNONE-Idro                           | 41.807779 | 14.369    | 744  | Cfb |
| 129 | Molise                | BONEFRO-Idro                          | 41.702779 | 14.935556 | 557  | Cfa |
| 130 | Molise                | CIVITACAMPOMARANO-Idro                | 41.780001 | 14.685667 | 462  | Cfa |
| 131 | Molise                | COLLETORTO-Idro                       | 41.66389  | 14.968889 | 450  | Cfa |

|     |          |                                        |           |           |     |     |
|-----|----------|----------------------------------------|-----------|-----------|-----|-----|
| 132 | Molise   | LARINO-Idro                            | 41.800557 | 14.919    | 418 | Cfa |
| 133 | Molise   | PONTE LISCIONE (ex GUARDIALFIERA)-Idro | 41.807223 | 14.808611 | 139 | Cfa |
| 134 | Molise   | RICCIA-Idro                            | 41.488334 | 14.835667 | 633 | Csa |
| 135 | Molise   | ROCCAMANDOLFI-Idro                     | 41.494445 | 14.352222 | 772 | Csa |
| 136 | Molise   | VINCHIATURO-Idro                       | 41.491668 | 14.585667 | 606 | Csa |
| 137 | Piemonte | Lavezze - Lago-Idro                    | 44.54953  | 8.82328   | 705 | Csb |
| 138 | Apulia   | BRINDISI-ST                            | 40.650005 | 17.95     | 10  | Csa |
| 139 | Apulia   | S. MARIA DI LEUCA-ST                   | 39.817006 | 18.35     | 112 | Csa |
| 140 | Sardinia | Aggius-Idro                            | 40.9291   | 9.0644    | 517 | Csa |
| 141 | Sardinia | Ala dei Sardi-Idro                     | 40.6506   | 9.3294    | 634 | Csa |
| 142 | Sardinia | Arborea-Idro                           | 39.7739   | 8.5807    | 7   | Csa |
| 143 | Sardinia | Armungia-Idro                          | 39.5229   | 9.3784    | 357 | Csa |
| 144 | Sardinia | Austis-Idro                            | 40.0715   | 9.0894    | 737 | Csa |
| 145 | Sardinia | Baradili F.C.-Idro                     | 39.7194   | 8.8969    | 161 | Csa |
| 146 | Sardinia | Barisardo-Idro                         | 39.8424   | 9.6433    | 34  | Csa |
| 147 | Sardinia | Barrali-Idro                           | 39.4845   | 9.0984    | 138 | Csa |
| 148 | Sardinia | Bassacutena (C.ra)-Idro                | 41.1097   | 9.2613    | 71  | Csa |
| 149 | Sardinia | Bau de Muggeris-Idro                   | 39.954    | 9.4264    | 759 | Csa |
| 150 | Sardinia | Baunei (C.ra)-Idro                     | 40.0299   | 9.6651    | 450 | Csa |
| 151 | Sardinia | Benetutti-Idro                         | 40.4546   | 9.1697    | 439 | Csa |
| 152 | Sardinia | Borore-Idro                            | 40.2214   | 8.8129    | 392 | Csa |
| 153 | Sardinia | CAGLIARI/ELMAS-ST                      | 39.25     | 9.067     | 5   | Csa |
| 154 | Sardinia | Caddau (C.ra)-Idro                     | 40.825    | 9.0911    | 581 | Csa |
| 155 | Sardinia | Capoterra-Idro                         | 39.1748   | 8.9707    | 48  | Csa |
| 156 | Sardinia | Carloforte-Idro                        | 39.1374   | 8.3124    | 5   | Csa |
| 157 | Sardinia | Codaruina-Idro                         | 40.93     | 8.8249    | 12  | Csa |
| 158 | Sardinia | Coghinas (C.ra)-Idro                   | 40.8631   | 8.9521    | 91  | Csa |
| 159 | Sardinia | Corongiu (Acquedotto)-Idro             | 39.3109   | 9.2807    | 173 | Csa |
| 160 | Sardinia | Cuglieri-Idro                          | 40.1902   | 8.5679    | 465 | Csa |
| 161 | Sardinia | Desulo-Idro                            | 40.0147   | 9.2298    | 901 | Csa |
| 162 | Sardinia | Domus de Maria-Idro                    | 38.9443   | 8.8638    | 80  | Csa |
| 163 | Sardinia | Gairo Taquisara F.C.-Idro              | 39.8567   | 9.4651    | 843 | Csa |
| 164 | Sardinia | Galtelli-Idro                          | 40.3874   | 9.615     | 18  | Csa |
| 165 | Sardinia | Genna Crexia (C.ra)-Idro               | 39.7836   | 9.553     | 370 | Csa |
| 166 | Sardinia | Goni-Idro                              | 39.5774   | 9.2861    | 418 | Csa |
| 167 | Sardinia | Is Cannoneris (Caserma)-Idro           | 39.0351   | 8.8529    | 594 | Csa |
| 168 | Sardinia | Laconi F.C.-Idro                       | 39.8563   | 9.0506    | 565 | Csa |
| 169 | Sardinia | Lanusei F.C.-Idro                      | 39.8794   | 9.5375    | 584 | Csa |
| 170 | Sardinia | Lula-Idro                              | 40.4704   | 9.4873    | 536 | Csa |
| 171 | Sardinia | Lunamatrona F.C.-Idro                  | 39.6513   | 8.8973    | 186 | Csa |
| 172 | Sardinia | Macciadosa (C.ra)-Idro                 | 40.7304   | 8.4029    | 70  | Csa |
| 173 | Sardinia | Macomer-Idro                           | 40.2693   | 8.7725    | 558 | Csa |
| 174 | Sardinia | Mandas F.C.-Idro                       | 39.6606   | 9.1307    | 483 | Csa |
| 175 | Sardinia | Marrubiu (C.ra)-Idro                   | 39.7711   | 8.6611    | 37  | Csa |
| 176 | Sardinia | Mazzinaiu (C.ra)-Idro                  | 40.7096   | 9.3716    | 604 | Csa |
| 177 | Sardinia | Montes (Caserma)-Idro                  | 40.1235   | 9.3946    | 980 | Csa |
| 178 | Sardinia | Montevecchio (M.ra)-Idro               | 39.5571   | 8.5706    | 397 | Csa |
| 179 | Sardinia | Nuraminis-Idro                         | 39.4427   | 9.0134    | 99  | Csa |

|     |          |                                |           |           |      |     |
|-----|----------|--------------------------------|-----------|-----------|------|-----|
| 180 | Sardinia | Nurri F.C.-Idro                | 39.7213   | 9.2295    | 561  | Csa |
| 181 | Sardinia | Olmedo F.C.-Idro               | 40.651    | 8.3775    | 57   | Csa |
| 182 | Sardinia | Orgosolo-Idro                  | 40.2045   | 9.3539    | 614  | Csa |
| 183 | Sardinia | Oristano FF.SS.-Idro           | 39.9025   | 8.603     | 11   | Csa |
| 184 | Sardinia | Orosei-Idro                    | 40.3805   | 9.6978    | 13   | Csa |
| 185 | Sardinia | Palau-Idro                     | 41.1815   | 9.383     | 21   | Csa |
| 186 | Sardinia | Pantaleo-Idro                  | 39.0902   | 8.7979    | 259  | Csa |
| 187 | Sardinia | Paulilatino-Idro               | 40.0831   | 8.7637    | 258  | Csa |
| 188 | Sardinia | Rifornitore Tirso-Idro         | 40.3259   | 9.0333    | 201  | Csa |
| 189 | Sardinia | Riola-Idro                     | 39.9964   | 8.5402    | 3    | Csa |
| 190 | Sardinia | S.Anna Arresi-Idro             | 39.0053   | 8.6408    | 64   | Csa |
| 191 | Sardinia | S.Anna-Oristano-Idro           | 39.8339   | 8.6273    | 12   | Csa |
| 192 | Sardinia | S.Chiaia d'Ula-Idro            | 40.0518   | 8.8694    | 116  | Csa |
| 193 | Sardinia | S.Gavino FF.SS.-Idro           | 39.5507   | 8.7904    | 56   | Csa |
| 194 | Sardinia | S.Giovanni (Domusnovas)-Idro   | 39.3372   | 8.6259    | 329  | Csa |
| 195 | Sardinia | S.Giovanni Coghinas(C.ra)-Idro | 40.8827   | 8.7565    | 277  | Csa |
| 196 | Sardinia | S.Giusta-Idro                  | 39.8747   | 8.6086    | 2    | Csa |
| 197 | Sardinia | S.Maria Coghinas (C.ra)-Idro   | 40.9109   | 8.8879    | 19   | Csa |
| 198 | Sardinia | S.Pantaleo-Idro                | 41.0472   | 9.4675    | 177  | Csa |
| 199 | Sardinia | Sa Pira (Caserma)-Idro         | 39.3096   | 9.1863    | 186  | Csa |
| 200 | Sardinia | Sadali F.C.-Idro               | 39.8155   | 9.2694    | 760  | Csa |
| 201 | Sardinia | Samugheo-Idro                  | 39.9479   | 8.941     | 366  | Csa |
| 202 | Sardinia | Santadi-Idro                   | 39.0935   | 8.7158    | 119  | Csa |
| 203 | Sardinia | Sedini-Idro                    | 40.851    | 8.8173    | 288  | Csa |
| 204 | Sardinia | Segariu-Idro                   | 39.5629   | 8.9829    | 135  | Csa |
| 205 | Sardinia | Seneghe-Idro                   | 40.0808   | 8.6127    | 285  | Csa |
| 206 | Sardinia | Seulo-Idro                     | 39.8706   | 9.2354    | 781  | Csa |
| 207 | Sardinia | Silanus-Idro                   | 40.2905   | 8.8815    | 457  | Csa |
| 208 | Sardinia | Stintino-Idro                  | 40.9374   | 8.2281    | 6    | Csa |
| 209 | Sardinia | Taroni (C.ra)-Idro             | 40.8945   | 9.2964    | 391  | Csa |
| 210 | Sardinia | Tega (C.ra)-Idro               | 40.1543   | 8.5253    | 281  | Csa |
| 211 | Sardinia | Teulada-Idro                   | 38.9697   | 8.7728    | 102  | Csa |
| 212 | Sardinia | Tonara-Idro                    | 40.0267   | 9.1752    | 1035 | Csa |
| 213 | Sardinia | Torpe-Idro                     | 40.6277   | 9.6766    | 13   | Csa |
| 214 | Sardinia | Uras FF.SS.-Idro               | 39.6993   | 8.7027    | 27   | Csa |
| 215 | Sardinia | Vallermosa-Idro                | 39.3632   | 8.7956    | 71   | Csa |
| 216 | Sardinia | Villacidro F.C.-Idro           | 39.463    | 8.7422    | 192  | Csa |
| 217 | Sardinia | Villagrande Strisaili-Idro     | 39.9614   | 9.5066    | 708  | Csa |
| 218 | Sardinia | Villamar F.C.-Idro             | 39.6181   | 8.9598    | 108  | Csa |
| 219 | Sardinia | Villanova Monteleone-Idro      | 40.5024   | 8.4734    | 539  | Csa |
| 220 | Sardinia | Villasimius-Idro               | 39.1434   | 9.5196    | 51   | Csa |
| 221 | Sardinia | Villasor FF.SS.-Idro           | 39.3813   | 8.9432    | 26   | Csa |
| 222 | Sicily   | AGRIGENTO-OA                   | 37.304668 | 13.588806 | 212  | Csa |
| 223 | Sicily   | ALCANTARA-OA                   | 37.825223 | 15.254667 | 45   | Csa |
| 224 | Sicily   | Agrigento-Idro                 | 37.303538 | 13.588111 | 212  | Csa |
| 225 | Sicily   | CALTAGIRONE-OA                 | 37.240807 | 14.518639 | 428  | Csa |
| 226 | Sicily   | CATENANUOVA-OA                 | 37.571807 | 14.693083 | 186  | Csa |
| 227 | Sicily   | CHIARAMONTE GULFI-OA           | 37.029557 | 14.70375  | 673  | Csa |

|     |                     |                                       |           |           |      |     |
|-----|---------------------|---------------------------------------|-----------|-----------|------|-----|
| 228 | Sicily              | CIAVOLO-OA                            | 37.760944 | 12.551611 | 98   | Csa |
| 229 | Sicily              | COZZO SPADARO-ST                      | 36.683001 | 15.133    | 51   | Csa |
| 230 | Sicily              | Caltagirone-Idro                      | 37.239687 | 14.517966 | 428  | Csa |
| 231 | Sicily              | Chiaramonte Gulfi-Idro                | 37.02844  | 14.703078 | 673  | Csa |
| 232 | Sicily              | Ciavolo-Idro                          | 37.759824 | 12.550884 | 98   | Csa |
| 233 | Sicily              | Corleone-Idro                         | 37.814435 | 13.301266 | 629  | Csa |
| 234 | Sicily              | LENTINI BONIFICA-OA                   | 37.344084 | 15.081639 | 2    | Csa |
| 235 | Sicily              | Mineo-Idro                            | 37.264437 | 14.690246 | 459  | Csa |
| 236 | Sicily              | NICOSIA-OA                            | 37.747945 | 14.397361 | 673  | Csa |
| 237 | Sicily              | Nicosia-Idro                          | 37.746826 | 14.396684 | 673  | Csa |
| 238 | Sicily              | PALAZZO ADRIANO-OA                    | 37.687083 | 13.379389 | 620  | Csa |
| 239 | Sicily              | PALERMO OSS. ASTRON.-OA               | 38.110278 | 13.351389 | 27   | Csa |
| 240 | Sicily              | Palazzo Adriano-Idro                  | 37.685958 | 13.378685 | 620  | Csa |
| 241 | Sicily              | Palermo Osservatorio Astronomico-Idro | 38.109161 | 13.350685 | 27   | Csa |
| 242 | Sicily              | Pietraperzia-Idro                     | 37.420459 | 14.137957 | 456  | Csa |
| 243 | Sicily              | SCIACCA-OA                            | 37.513    | 13.127583 | 110  | Csa |
| 244 | Sicily              | SCILLATO-OA                           | 37.863279 | 13.915056 | 425  | Csa |
| 245 | Sicily              | Sciacca-Idro                          | 37.511873 | 13.126871 | 110  | Csa |
| 246 | Sicily              | Scillato-Idro                         | 37.862159 | 13.914364 | 425  | Csa |
| 247 | Trentino Alto Adige | Ala-MT                                | 45.757143 | 10.999862 | 165  | Cfb |
| 248 | Trentino Alto Adige | Cles-MT                               | 46.362003 | 11.031223 | 665  | Dfb |
| 249 | Trentino Alto Adige | Cogolo Pont (Centrale)-MT             | 46.362229 | 10.688066 | 1185 | ET  |
| 250 | Trentino Alto Adige | Diga di Vizzate Osservatore-Idro      | 46.924992 | 11.524672 | 1415 | ET  |
| 251 | Trentino Alto Adige | Fundres-Idro                          | 46.88718  | 11.702943 | 1151 | ET  |
| 252 | Trentino Alto Adige | Male-MT                               | 46.355098 | 10.916104 | 735  | ET  |
| 253 | Trentino Alto Adige | Mezzana-MT                            | 46.313429 | 10.795807 | 905  | ET  |
| 254 | Trentino Alto Adige | Monte Maria-Idro                      | 46.705689 | 10.521268 | 1256 | ET  |
| 255 | Trentino Alto Adige | Rovereto-MT                           | 45.896097 | 11.043954 | 203  | Cfb |
| 256 | Trentino Alto Adige | S. Martino di Castrozza-MT            | 46.261299 | 11.801413 | 1450 | Dfc |
| 257 | Trentino Alto Adige | S.Maddalena in Casies-Idro            | 46.83526  | 12.242719 | 1456 | ET  |
| 258 | Trentino Alto Adige | Sesto-Idro                            | 46.703054 | 12.349964 | 1490 | ET  |
| 259 | Trentino Alto Adige | Silandro-Idro                         | 46.623755 | 10.78027  | 684  | ET  |
| 260 | Trentino Alto Adige | Terragnolo (Piazza)-MT                | 45.879596 | 11.150991 | 800  | Cfb |
| 261 | Trentino Alto Adige | Trento (Laste)-MT                     | 46.071872 | 11.135627 | 312  | Dfb |
| 262 | Trentino Alto Adige | Vipiteno-Idro                         | 46.897825 | 11.42939  | 946  | Dfc |
| 263 | Tuscany             | Acquisti-Idro                         | 42.848331 | 11.060416 | 5    | Csa |
| 264 | Tuscany             | Alberese Idraulico-Idro               | 42.695944 | 11.092726 | 5    | Csa |
| 265 | Tuscany             | Alberese Podere 129-Idro              | 42.673511 | 11.142315 | 21   | Csa |
| 266 | Tuscany             | Badia Prataglia-Idro                  | 43.7942   | 11.876816 | 935  | Cfb |
| 267 | Tuscany             | Batignano-Idro                        | 42.86805  | 11.16573  | 168  | Csa |
| 268 | Tuscany             | Bettolle-Idro                         | 43.202908 | 11.803501 | 281  | Cfb |
| 269 | Tuscany             | Borgo a Mozzano-Idro                  | 43.979877 | 10.55151  | 245  | Cfa |
| 270 | Tuscany             | Capanne-Idro                          | 42.685646 | 11.543856 | 399  | Csa |
| 271 | Tuscany             | Capezzine-Idro                        | 43.182892 | 11.932172 | 324  | Cfb |
| 272 | Tuscany             | Castagno-Idro                         | 43.899297 | 11.660852 | 794  | Cfb |
| 273 | Tuscany             | Castel del Piano-Idro                 | 42.893105 | 11.534185 | 548  | Csa |
| 274 | Tuscany             | Castelnuovo Garfagnana-Idro           | 44.112165 | 10.415527 | 318  | Csb |
| 275 | Tuscany             | Castiglion Fiorentino-Idro            | 43.342826 | 11.928964 | 281  | Cfb |

|     |         |                               |           |           |      |     |
|-----|---------|-------------------------------|-----------|-----------|------|-----|
| 276 | Tuscany | Certaldo-Idro                 | 43.546531 | 11.035636 | 74   | Cfa |
| 277 | Tuscany | Chianciano-Idro               | 43.062454 | 11.834466 | 377  | Cfb |
| 278 | Tuscany | Cireglio-Idro                 | 43.995497 | 10.854748 | 708  | Cfa |
| 279 | Tuscany | Cortona-Idro                  | 43.268995 | 11.996448 | 485  | Cfb |
| 280 | Tuscany | Frassa-Idro                   | 44.113081 | 10.713465 | 1034 | Cfb |
| 281 | Tuscany | Grosseto-Idro                 | 42.751393 | 11.117392 | 9    | Csa |
| 282 | Tuscany | La Foce-Idro                  | 43.017539 | 11.780613 | 570  | Cfb |
| 283 | Tuscany | La Verna-Idro                 | 43.706911 | 11.931335 | 1053 | Cfb |
| 284 | Tuscany | Lorenzana-Idro                | 43.53704  | 10.53536  | 89   | Cfa |
| 285 | Tuscany | Marliana-Idro                 | 43.920488 | 10.773258 | 376  | Cfa |
| 286 | Tuscany | Massa-Idro                    | 44.034082 | 10.141306 | 51   | Csb |
| 287 | Tuscany | Melo-Idro                     | 44.131362 | 10.743544 | 1088 | Cfb |
| 288 | Tuscany | Montecatini Terme-Idro        | 43.896797 | 10.773986 | 120  | Cfa |
| 289 | Tuscany | Montepulciano-Idro            | 43.093426 | 11.783248 | 469  | Cfb |
| 290 | Tuscany | Mutigliano-Idro               | 43.881763 | 10.484186 | 40   | Csa |
| 291 | Tuscany | Nugola-Idro                   | 43.576948 | 10.439887 | 42   | Csa |
| 292 | Tuscany | Ortignano-Idro                | 43.681925 | 11.751541 | 428  | Cfb |
| 293 | Tuscany | PISA/S. GIUSTO-ST             | 43.683    | 10.383    | 6    | Csa |
| 294 | Tuscany | Pari-Idro                     | 43.065282 | 11.321564 | 295  | Csa |
| 295 | Tuscany | Pescia-Idro                   | 43.91046  | 10.689332 | 133  | Cfa |
| 296 | Tuscany | Pisa (Fac. Agraria)-Idro      | 43.710727 | 10.413162 | 4    | Csa |
| 297 | Tuscany | Pontecosi-Idro                | 44.13402  | 10.38436  | 393  | Csb |
| 298 | Tuscany | Populonia-Idro                | 42.990162 | 10.490456 | 127  | Csa |
| 299 | Tuscany | Riparbella-Idro               | 43.367253 | 10.603037 | 241  | Csa |
| 300 | Tuscany | Roccastrada-Idro              | 43.011494 | 11.16947  | 430  | Csa |
| 301 | Tuscany | Rocchetta-Idro                | 43.223628 | 10.595795 | 41   | Csa |
| 302 | Tuscany | S. Donato-Idro                | 42.53373  | 11.230903 | 11   | Csa |
| 303 | Tuscany | S. Leopoldo-Idro              | 42.751598 | 10.979112 | 1    | Csa |
| 304 | Tuscany | Saline di Volterra-Idro       | 43.361127 | 10.81599  | 84   | Csa |
| 305 | Tuscany | Stiappa-Idro                  | 43.994901 | 10.711244 | 582  | Cfa |
| 306 | Tuscany | Tendola-Idro                  | 44.16089  | 10.03783  | 290  | Csb |
| 307 | Tuscany | Vallombrosa-Idro              | 43.731367 | 11.556821 | 1050 | Cfb |
| 308 | Tuscany | Montescudaio-Idro             | 43.268789 | 10.614793 | 82   | Csa |
| 309 | Tuscany | S. Marcello Pistoiese-Idro    | 44.057041 | 10.789502 | 610  | Cfb |
| 310 | Tuscany | Villacollemantina-Idro        | 44.161529 | 10.387754 | 535  | Csb |
| 311 | Veneto  | Andraz UI-TEMPV               | 46.488561 | 11.988284 | 1550 | Dfc |
| 312 | Veneto  | Auronzo di Cadore UI-TEMPV    | 46.539665 | 12.463614 | 867  | ET  |
| 313 | Veneto  | Boccafossa UI-TEMPV           | 45.662752 | 12.743192 | 1    | Cfa |
| 314 | Veneto  | Bovolenta UI-TEMPV            | 45.276009 | 11.932109 | 7    | Cfa |
| 315 | Veneto  | Castelfranco Veneto UI-TEMPV  | 45.672848 | 11.933377 | 40   | Cfb |
| 316 | Veneto  | Cavanella Motte UI-TEMPV      | 45.123549 | 12.237094 | 3    | Cfa |
| 317 | Veneto  | Chies d'Alpago UI-TEMPV       | 46.164554 | 12.389593 | 661  | Dfc |
| 318 | Veneto  | Concordia Sagittaria UI-TEMPV | 45.701851 | 12.87242  | 1    | Cfa |
| 319 | Veneto  | Cortina d'Ampezzo UI-TEMPV    | 46.539203 | 12.135784 | 1219 | ET  |
| 320 | Veneto  | Fortogna UI-TEMPV             | 46.234552 | 12.293272 | 423  | Dfc |
| 321 | Veneto  | Fossa UI-TEMPV                | 45.655688 | 12.657087 | 1    | Cfa |
| 322 | Veneto  | Gambarare UI-TEMPV            | 45.414094 | 12.149539 | 3    | Cfa |
| 323 | Veneto  | Motta di Livenza UI-TEMPV     | 45.774298 | 12.604834 | 7    | Cfa |

|     |        |                               |           |           |     |     |
|-----|--------|-------------------------------|-----------|-----------|-----|-----|
| 324 | Veneto | Portesine Sile UI-TEMPV       | 45.559878 | 12.439474 | 2   | Cfb |
| 325 | Veneto | S. Antonio di Tortal UI-TEMPV | 46.041554 | 12.163304 | 660 | Dfc |
| 326 | Veneto | S. Croce del Lago UI-TEMPV    | 46.12963  | 12.318852 | 383 | Dfc |
| 327 | Veneto | S. Donà di Piave UI-TEMPV     | 45.628854 | 12.563747 | 3   | Cfa |
| 328 | Veneto | Schio UI-TEMPV                | 45.714672 | 11.418167 | 160 | Cfb |
| 329 | Veneto | Termine UI-TEMPV              | 45.600515 | 12.806666 | 2   | Cfa |
| 330 | Veneto | VERONA/VILLAFRANCA-ST         | 45.383    | 10.867    | 68  | Cfa |
| 331 | Veneto | Villa Bacino UI-TEMPV         | 45.686533 | 12.948263 | 2   | Cfa |
| 332 | Veneto | Zovencedo UI-TEMPV            | 45.427996 | 11.499012 | 279 | Cfa |

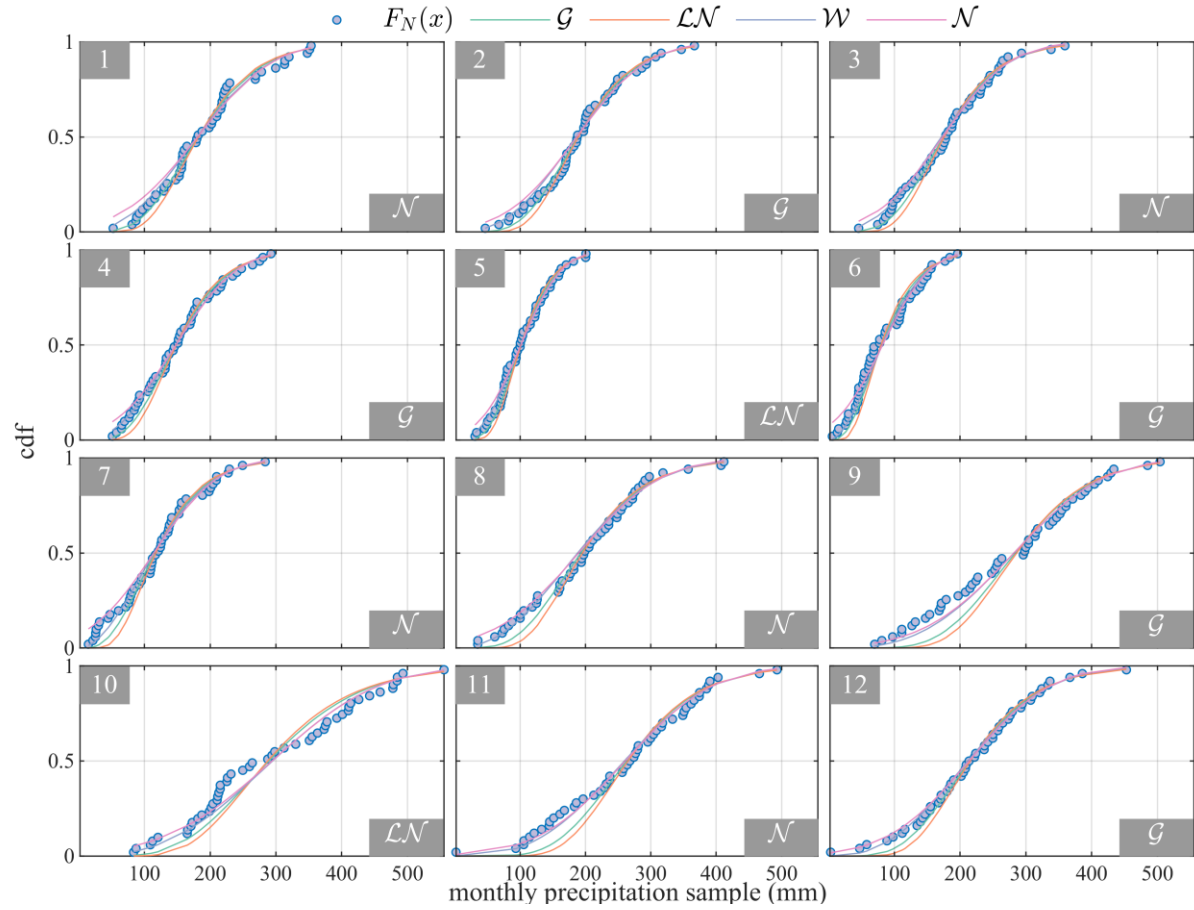

Figure S1. Fitting performance of the four tested probability distributions to 3-months precipitation samples for the Roma/Ciampino station. In each panel, the upper-left box indicates the last month of the accumulation period; while the right-lower box the best fitting distribution identified with the MSEN method.



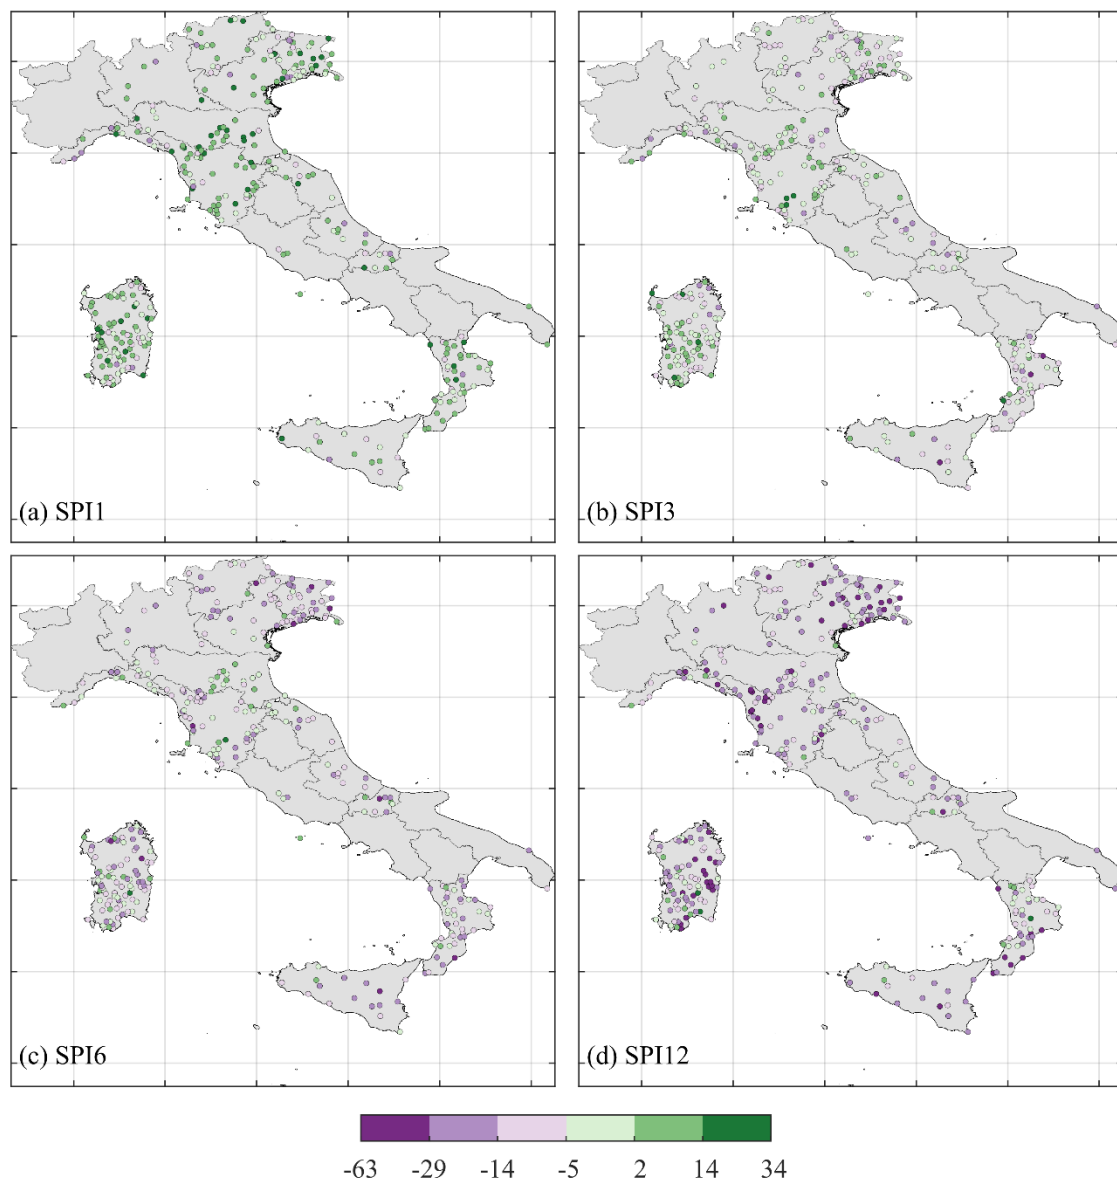

Figure S2. Maps showing the difference in terms of number of drought months detected by the two approaches for all the time scales. Positive and negative values are related to more drought months detected by the BFA then the SA, respectively.

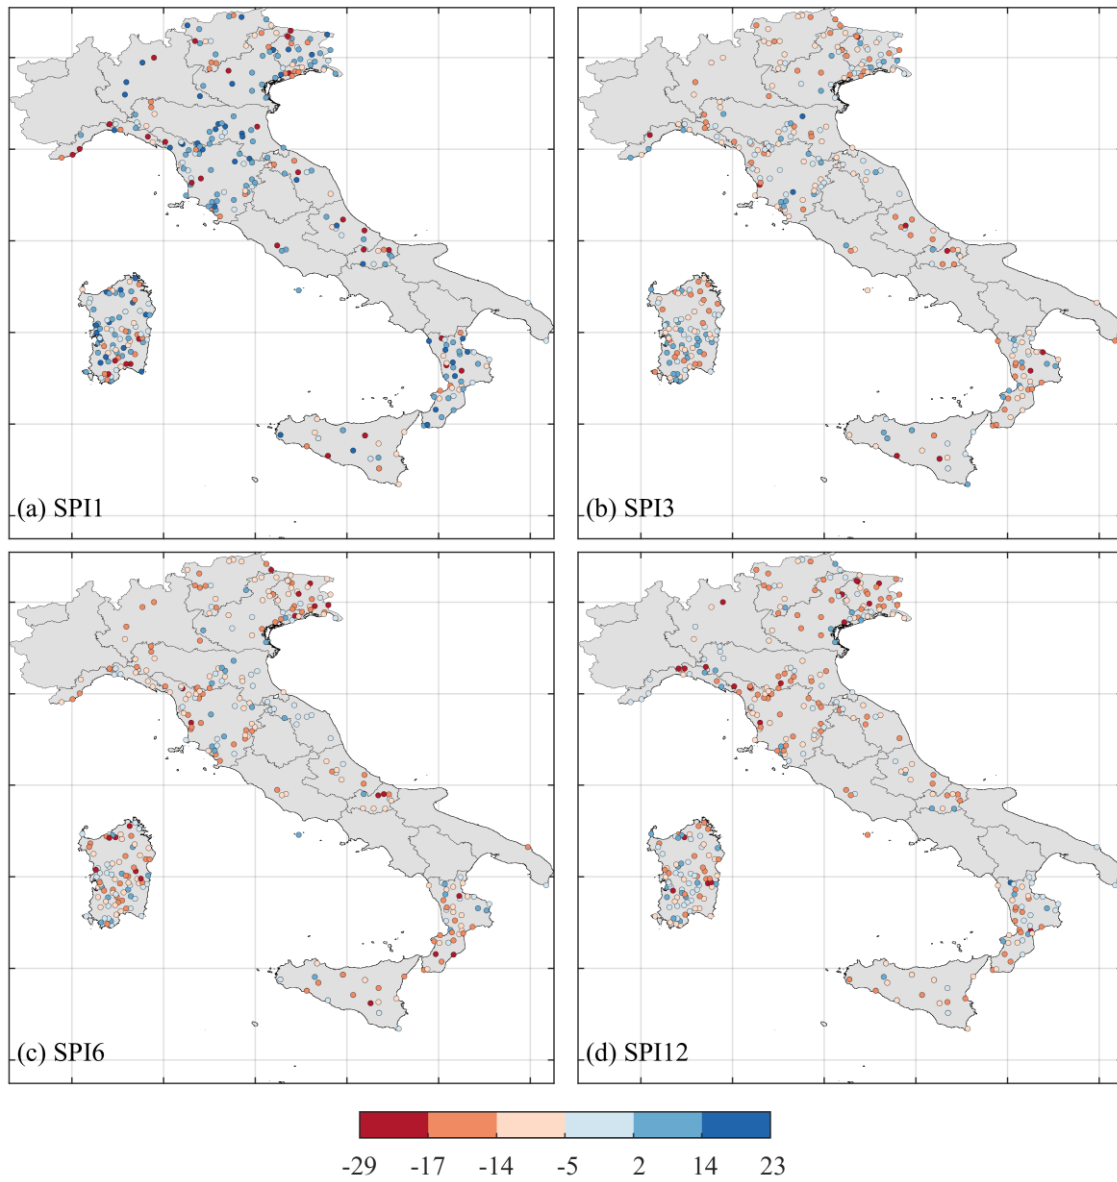

Figure S3. Maps showing the difference in terms of number of events detected by the two approaches for all the time scales. Positive and negative values are related to more events detected by the BFA then the SA, respectively.

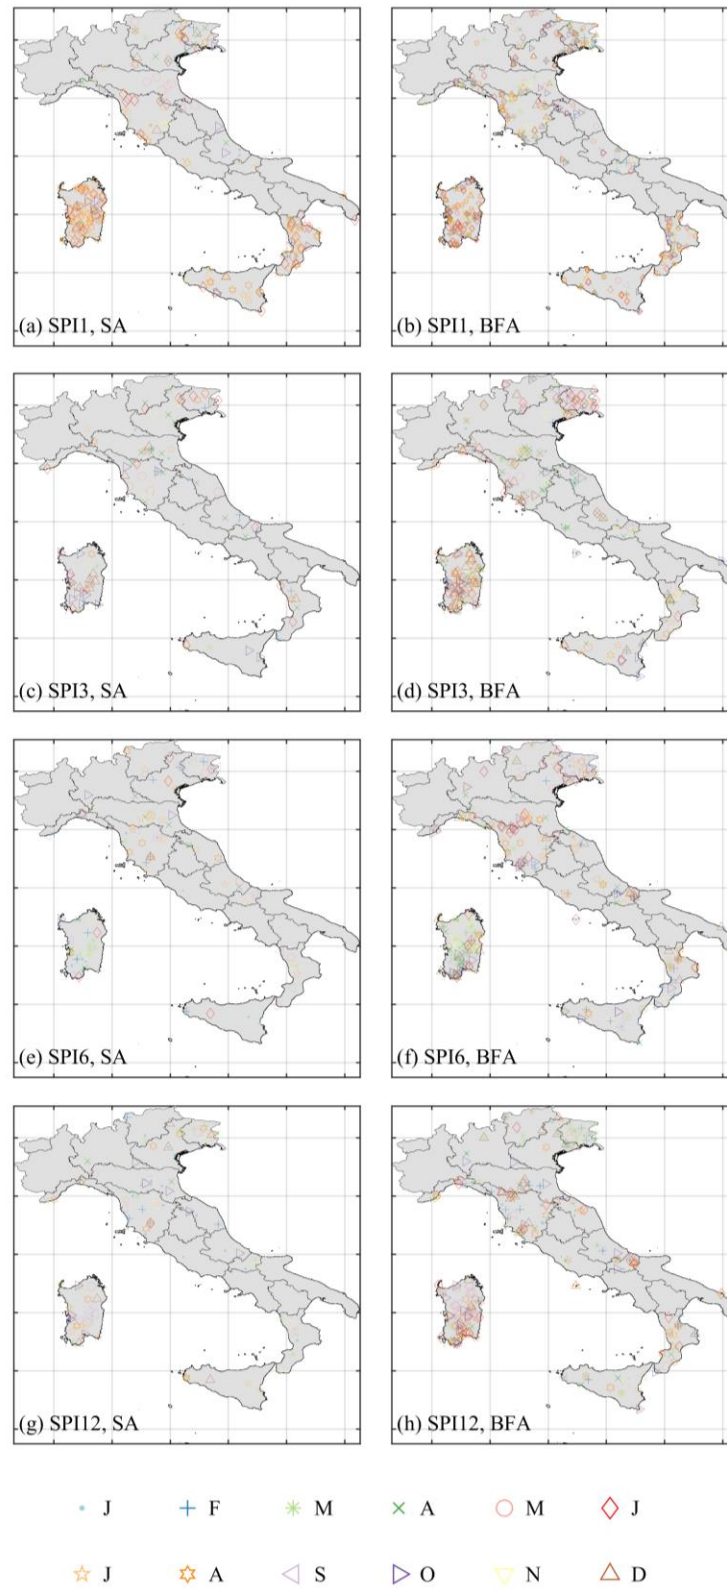

Figure S4. Maps showing the location of the non-normal distributed SPI signals for both the approaches. Each marker indicates a different month.

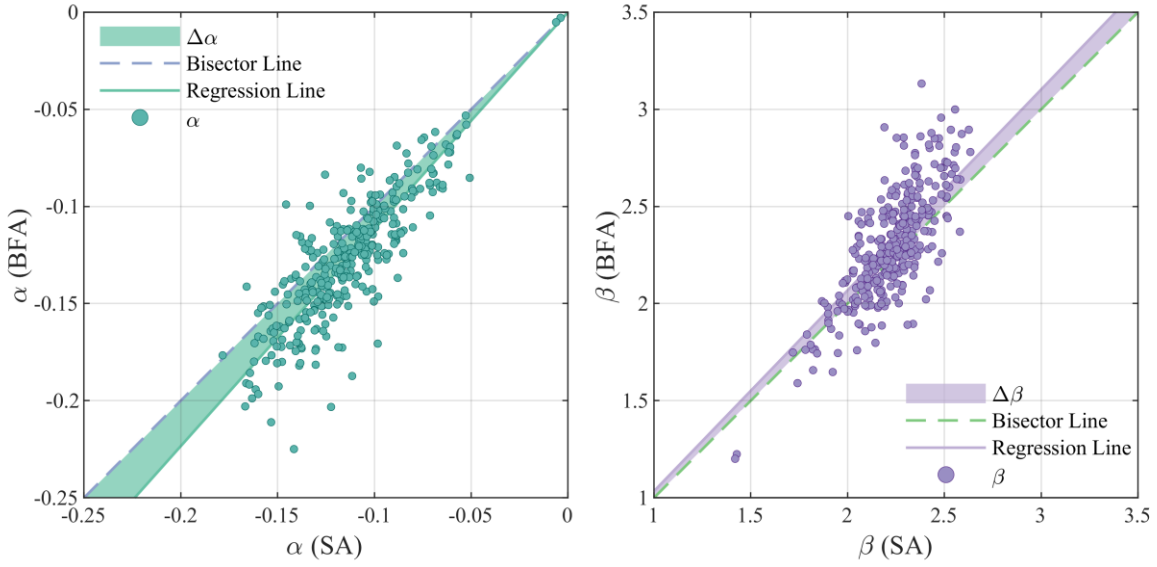

Figure S5. Comparison method based on  $\Delta$  angle.  $\alpha$  and  $\beta$  values are those obtained for SPI6 and 10-years return period. The angular deviation is evaluated as  $\Delta = \theta - 45^\circ$ , where  $\theta = \sum(\alpha(SA) \cdot \alpha(BFA)) / \sum \alpha(SA)^2$  and  $\theta = \sum(\beta(SA) \cdot \beta(BFA)) / \sum \beta(SA)^2$ . Positive values of  $\Delta$  indicates that, in general, the BFA has greater values of  $\alpha$  and  $\beta$  than the SA, and vice versa.
